# Supplementary material for: Synthesis and metal–support interaction of subnanometer copper–palladium bimetallic oxide clusters for catalytic oxidation of carbon monoxide
Source: Royal Society of Chemistry journal article supplement (doi:10.1039/c6qi00535g), 2017-01-01
Supplement: c6qi00535g1.pdf [file c6qi00535g1.pdf]

*Supporting Information for*

# Synthesis and Metal-Support Interaction of Subnanometer Copper-Palladium Bimetallic Oxide Clusters for Catalytic Oxidation of Carbon Monoxide

*Pei-Pei Du<sup>a</sup>, Xiu-Cui Hu<sup>b</sup>, Xu Wang<sup>a</sup>, Chao Ma<sup>c,\*</sup>, Meng Du<sup>a,d</sup>, Jie Zeng<sup>c</sup>, Chun-  
Jiang Jia<sup>b,\*</sup>, Yu-Ying Huang<sup>a</sup>, Rui Si<sup>a,\*</sup>*

<sup>a</sup> Shanghai Synchrotron Radiation Facility, Shanghai Institute of Applied Physics,  
Chinese Academy of Sciences, Shanghai 201204, China

<sup>b</sup> Key Laboratory for Colloid and Interface Chemistry, Key Laboratory of Special  
Aggregated Materials, School of Chemistry and Chemical Engineering, Shandong  
University, Jinan 250100, China

<sup>c</sup> Hefei National Laboratory for Physical Sciences at the Microscale, University of  
Science and Technology of China, Hefei, Anhui 230026, China

<sup>d</sup> Department of Chemistry, College of Science, Shanghai University, Shanghai  
200444, China

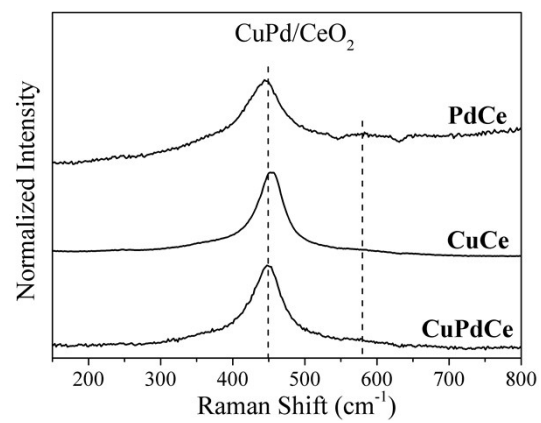

**Fig. S1** Raman spectra of ceria-supported copper-palladium oxides.

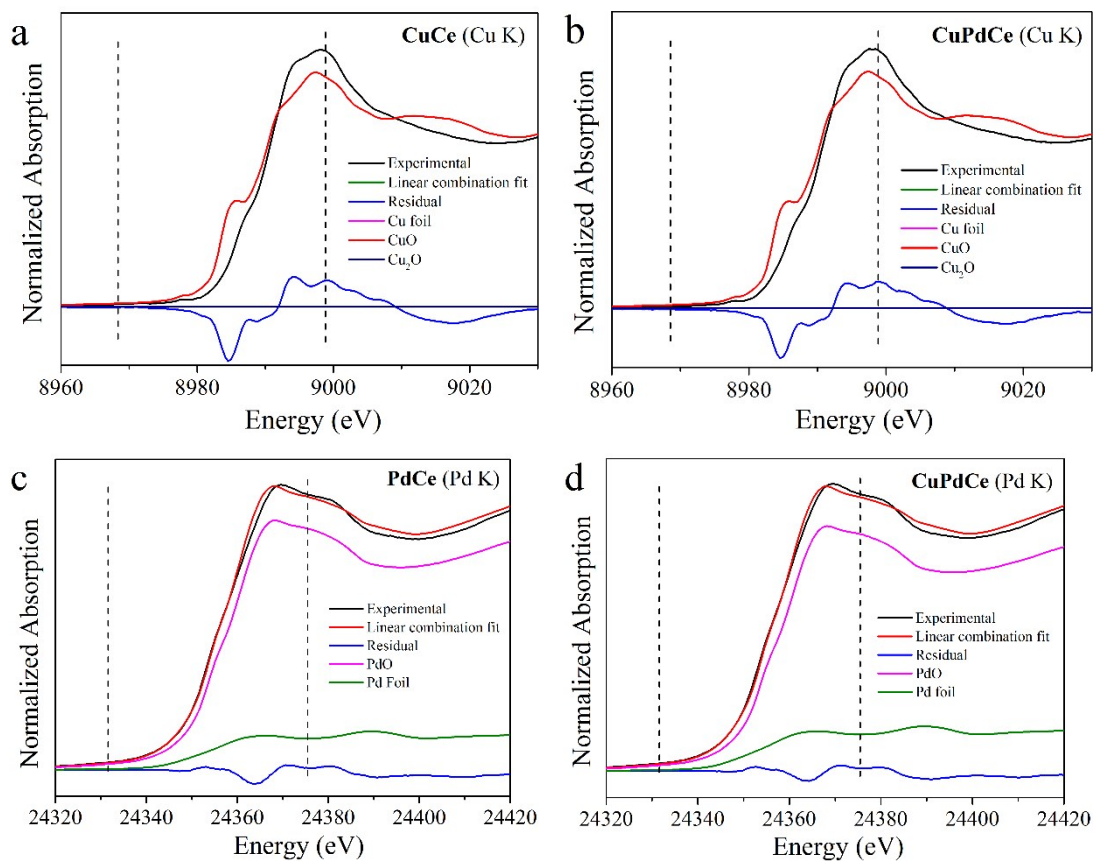

**Fig. S2** Linear combination fit results on XANES profiles of ceria-supported copper-palladium oxides: (a) **CuCe**, Cu K edge; (b) **CuPdCe**, Cu K edge; (c) **PdCe**, Pd K edge; (d) **CuPdCe**, Pd K edge.

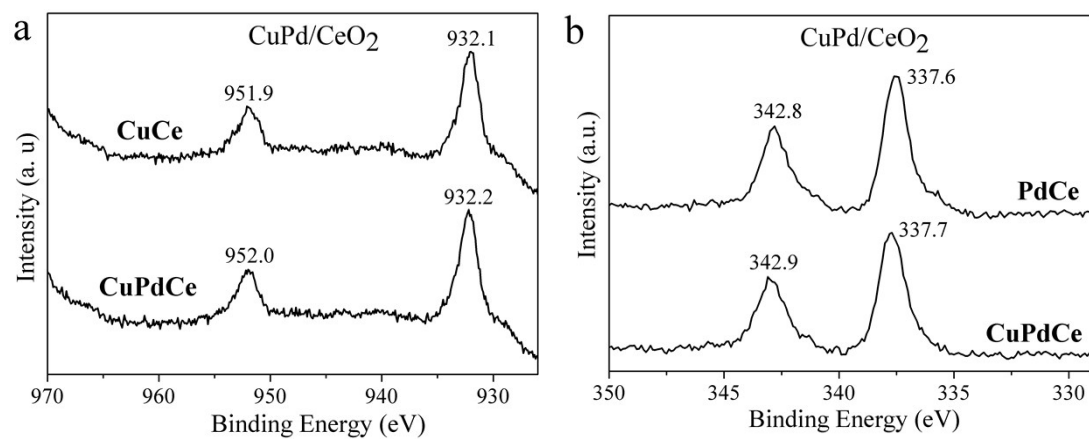

**Fig. S3** XPS spectra of ceria-supported copper-palladium oxides: (a) Cu 2p; (b) Pd 3d.
